# Supplementary material for: An alginate film-based degradable triboelectric nanogenerator
Source: Royal Society of Chemistry journal article supplement (doi:10.1039/c7ra13294h), 2018-01-01
Supplement: c7ra13294h1.pdf [file c7ra13294h1.pdf]

## 1 Supporting Information

### 2 Alginate film-based degradable triboelectric nanogenerator

3

4 Yaokun Pang<sup>a, b, 1</sup>, Fengben Xi<sup>a, b, 1</sup>, Jianjun Luo<sup>a, b</sup>, Guoxu Liu<sup>a, b</sup>, Tong Guo<sup>a, b, c</sup>, Chi Zhang<sup>a, b, \*</sup>

5

6 <sup>a</sup>CAS for Excellence in Nanoscience, Beijing Institute of Nanoenergy and Nanosystems, Chinese Academy of  
7 Sciences, National Center for Nanoscience and Technology (NCNST), Beijing 100083, China

8 <sup>b</sup>School of Nanoscience and Technology, University of Chinese Academy of Sciences, Beijing 100049, P. R. China.

9 <sup>c</sup>Department of Physics and Laboratory of Material Physics, Zhengzhou University, Zhengzhou 450052, China

10 \*Corresponding author.

11 E-mail addresses: [czhang@binn.cas.cn](mailto:czhang@binn.cas.cn) (C. Zhang)

12 <sup>1</sup>These authors contributed equally to this work.

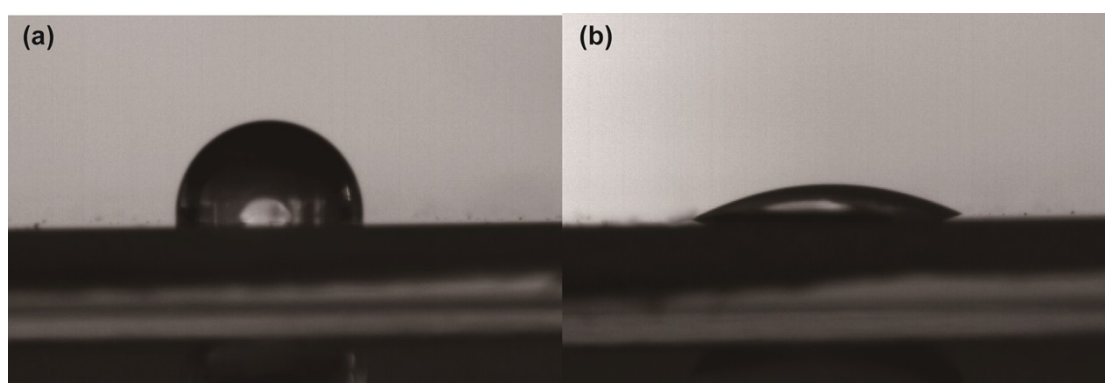

13

14 **Figure S1.** Photograph of a sodium alginate droplet on the culture dish. (a) Before the UV-ozone treatment, the  
15 culture dish surface is hydrophobic and it is difficult to form thinner sodium alginate film. (b) After the UV-ozone  
16 treatment, culture dish surface becomes hydrophilic and it is easy to form thinner sodium alginate film.

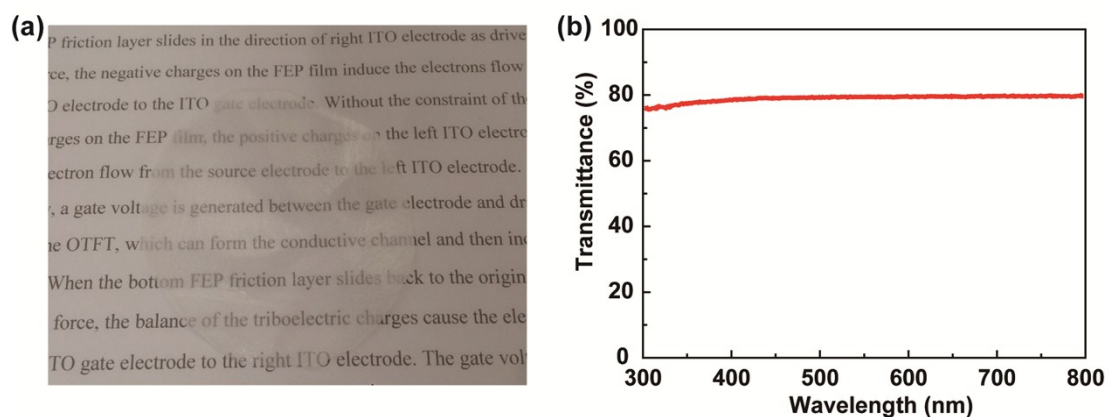

17

18 **Figure S2.** Transmittance performance of the calcium alginate film. (a) Photographic image of the thin calcium  
19 alginate film. (b) The UV-vis spectrum of the thin calcium alginate film.

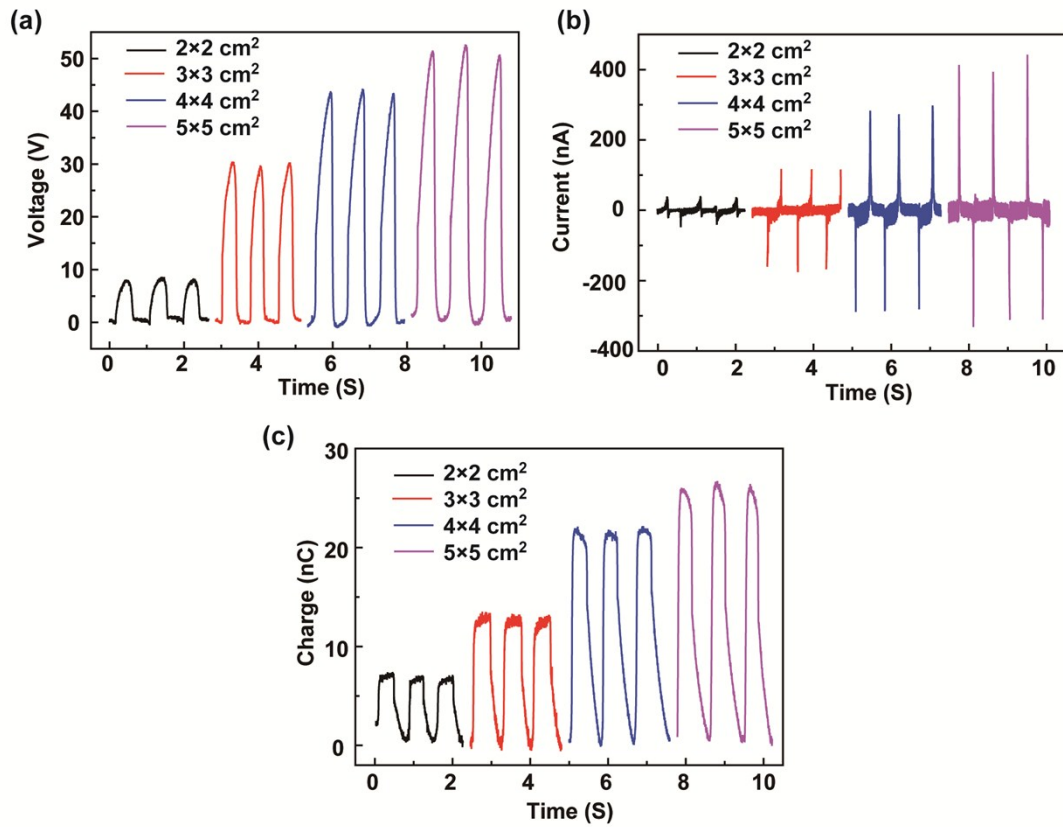

1  
 2 **Figure S3.** The effects of the film area on the electrical output characteristics. The measured open-circuit voltage  
 3 (a), short-circuit current (b) and transferred charge (c) of the fabricated TENG at different film area.

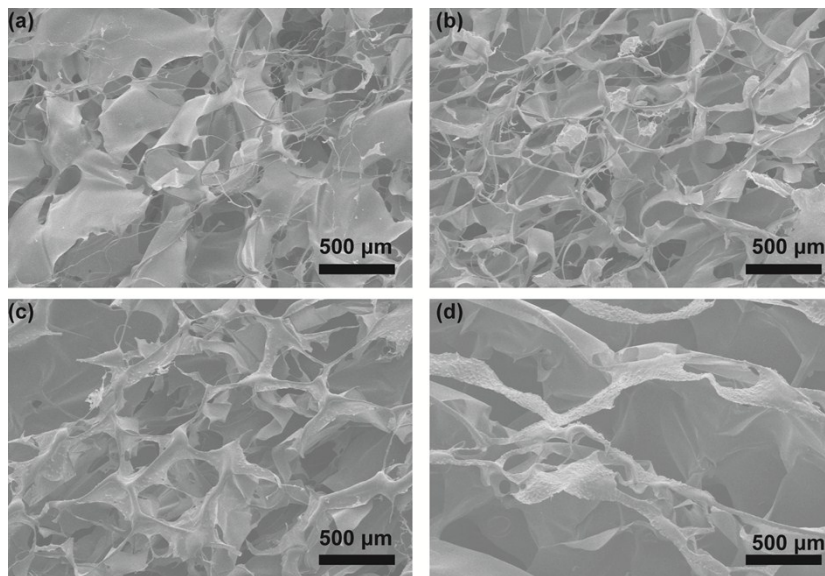

4  
 5 **Figure S4.** The SEM image of the calcium alginate films with the sodium alginate solution concentration of (a)  
 6 0.5%, (b) 1%, (c) 1.5% and (d) 2%.

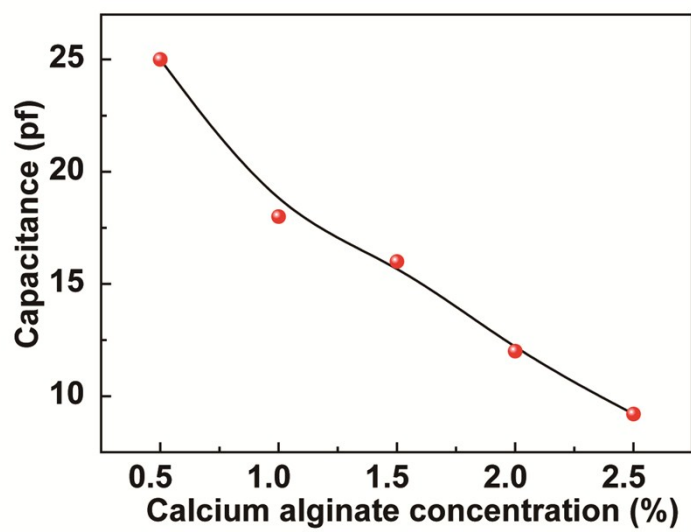

1

2 **Figure S5.** The film capacitance depended on the calcium alginate concentration.

3

4

5
